# Supplementary material for: Bimagrumab vs Optimized Standard of Care for Treatment of Sarcopenia in Community-Dwelling Older Adults: A Randomized Clinical Trial
Source: PubMed Central journal article supplement — JAMA Netw Open. 2020 Oct 19;3(10):e2020836. doi: 10.1001/jamanetworkopen.2020.20836 (PMC7573681; doi:10.1001/jamanetworkopen.2020.20836), 2020-10-19
Supplement: jamanetwopen-e2020836-s003.pdf [file jamanetwopen-e2020836-s003.pdf]

## Data Sharing Statement

Rooks. Bimagrumab vs Optimized Standard of Care for Treatment of Sarcopenia in Community-Dwelling Older Adults. *JAMA Netw Open*. Published October 19, 2020. 10.1001/jamanetworkopen.2020.20836

### Data

**Data available:** Yes

**Data types:** Deidentified participant data, Data dictionary

**How to access data:** Data will be made available if the manuscript is published in the journal.

**When available:** With publication

### Supporting Documents

**Document types:** Informed consent form

**How to access documents:** The ICF will be available with the other reference materials. [Daniel.rooks@novartis.com](mailto:Daniel.rooks@novartis.com)

**When available:** With publication

### Additional Information

**Who can access the data:** Researchers whose proposed use of the data has been approved.

**Types of analyses:** Any purpose

**Mechanisms of data availability:** After approval of a proposal.
